# Supplementary material for: Effect of a Water-Soluble Alkylene Oxide Copolymer Based Bone Hemostat in Cardiac Surgery: A Prospective, Multicenter, Single-Arm Study
Source: Research Square preprint supplement (doi:10.21203/rs.3.rs-8248923/v1), 2026-02-02
Supplement: Supplementary file 1 [file b6cb9608bf0a4a60ca84b131.docx]

**SUPPLEMENTARY MATERIAL**

Table E1. Summary of Serious Treatment Emergent Adverse Events

| MedDRA Terminology1 | | Total  (N = 90) | | |
| --- | --- | --- | --- | --- |
| MedDRA  System Organ Class | MedDRA  Preferred Term | Number of Patients  n (%) | Number of Events | Number of Events per Patient |
| OVERALL | OVERALL | 13 (14.44) | 18 | 0.20 |
| Cardiac disorders | OVERALL | 5 (5.56) | 6 | 0.07 |
| Arrhythmia | 1 (1.11) | 1 | 0.01 |
| Atrial fibrillation | 2 (2.22) | 2 | 0.02 |
| Cardiac tamponade | 1 (1.11) | 1 | 0.01 |
| Pericardial effusion | 1 (1.11) | 1 | 0.01 |
| Supraventricular   tachycardia | 1 (1.11) | 1 | 0.01 |
| Gastrointestinal disorders | OVERALL | 1 (1.11) | 1 | 0.01 |
| Pneumoperitoneum | 1 (1.11) | 1 | 0.01 |
| General disorders | OVERALL | 1 (1.11) | 1 | 0.01 |
|  | Multiple organ   dysfunction   syndrome | 1 (1.11) | 1 | 0.01 |
| Infections and infestations | OVERALL | 4 (4.44) | 4 | 0.04 |
| Localized infection | 1 (1.11) | 1 | 0.01 |
| Mediastinal abscess | 1 (1.11) | 1 | 0.01 |
| Post-operative   wound infection | 1 (1.11) | 1 | 0.01 |
| Sepsis | 1 (1.11) | 1 | 0.01 |
| Injury, poisoning, and procedural complications | OVERALL | 1 (1.11) | 1 | 0.01 |
| Seroma | 1 (1.11) | 1 | 0.01 |
| Respiratory, thoracic, and mediastinal disorders | OVERALL | 5 (5.56) | 5 | 0.06 |
| Hemothorax | 2 (2.22) | 2 | 0.02 |
| Pleural effusion | 2 (2.22) | 2 | 0.02 |
| Respiratory failure | 1 (1.11) | 1 | 0.01 |
| 1. MedDRA (Medical Dictionary for Regulatory Activities) is a clinically validated international medical terminology used by regulatory authorities and the regulated biopharmaceutical industry. | | | | |
